# Supplementary material for: Electronic health record intervention to increase use of NSAIDs as analgesia for hospitalised patients: a cluster randomised controlled study
Source: HighWire-hosted journal article supplement (doi:10.1136/bmjhci-2023-100842), 2023-12-01
Supplement: bmjhci-2023-100842supp001_data_supplement.pdf [file bmjhci-2023-100842supp001_data_supplement.pdf]

**eAppendix 1: CONSORT Checklist**

see attached checklist

**eAppendix 2: Power calculation:**

The power calculation was based on following calculations below:

|                         |       |                                                                                                            |
|-------------------------|-------|------------------------------------------------------------------------------------------------------------|
| $\alpha$ (two-tailed) = | 0.05  | Threshold probability for rejecting the null hypothesis. Type I error rate.                                |
| $\beta$ =               | 0.20  | Probability of failing to reject the null hypothesis under the alternative hypothesis. Type II error rate. |
| $q_1$ =                 | 0.500 | Proportion of subjects that are in Group 1 (exposed)                                                       |
| $q_0$ =                 | 0.500 | Proportion of subjects that are in Group 0 (unexposed); $1 - q_1$                                          |
| $P_0$ =                 | 0.15  | Risk in Group 0 (baseline risk)                                                                            |

Enter any ONE of the following three parameters (the other two will be calculated automatically):

|         |        |                                                         |
|---------|--------|---------------------------------------------------------|
| $P_1$ = | 0.2500 | Risk in Group 1 (exposed)                               |
| OR =    | 1.8889 | Odds ratio<br>( $P_1 / (1 - P_1) / (P_0 / (1 - P_0))$ ) |
| RR =    | 1.6667 | Risk ratio ( $P_1$ to $P_0$ )                           |

Calculate

The standard normal deviate for  $\alpha = Z_\alpha = 1.9600$   
 The standard normal deviate for  $\beta = Z_\beta = 0.8416$   
 Pooled proportion =  $P = (q_1 * P_1) + (q_0 * P_0) = 0.2000$   
 $A = Z_\alpha \sqrt{P(1-P)(1/q_1 + 1/q_0)} = 1.5680$   
 $B = Z_\beta \sqrt{P_1(1-P_1)(1/q_1) + P_0(1-P_0)(1/q_0)} = 0.6680$   
 $C = (P_1 - P_0)^2 = 0.0100$   
 Total group size =  $N = (A+B)^2/C = 500$   
 Continuity correction (added to N for Group 0) =  $CC = 1/(q_1 * |P_1 - P_0|) = 20$

## Sample size (with continuity correction)

|               | N          | Outcome+   | Outcome-   |
|---------------|------------|------------|------------|
| Group 1:      | 270        | 68         | 202        |
| Group 0:      | 270        | 41         | 229        |
| <b>Total:</b> | <b>540</b> | <b>109</b> | <b>431</b> |

## Sample size (without continuity correction)

|               | N          | Outcome+   | Outcome-   |
|---------------|------------|------------|------------|
| Group 1:      | 250        | 63         | 187        |
| Group 0:      | 250        | 38         | 212        |
| <b>Total:</b> | <b>500</b> | <b>101</b> | <b>399</b> |

Note: This calculator uses the normal distribution (with and without the continuity correction) as an approximation to the binomial distribution.

### eAppendix 3: Electronic Health Record Intervention, Hard Stop Versus Prechecked

#### ▼ Core Medications

##### ▼ Opioid-Sparing Pain Medication Section

- 2020 Pain Order Set Education

##### Pain Medication for Patients able to take oral medication

- 2020 Pain Order Set Education

The patient will have only mild intermittent pain

The patient has or will have more than mild intermittent pain

##### **!** Step 1: Select acetaminophen approach appropriate for patient (must select one)

Acetaminophen Dose Limit 4 grams

Acetaminophen Dose Limit 2 grams

The patient cannot receive acetaminophen because of contraindications (e.g. monitoring for neutropenic fever, acetaminophen allergy)

##### **!** Step 2: Select NSAID, if appropriate

**Patient cannot receive NSAIDs:** Has contraindications (transplant patient, active bleeding, recent GI bleeding, CHF, eGFR<60, monitoring for neutropenic fever, on therapeutic anticoagulation where bleeding risk greater than benefit, documented allergy, or pregnancy)

Preferred : Ibuprofen (MOTRIN) tablet

Alternate for patients briefly not able to take PO: Ketorolac/Ibuprofen

The patient cannot receive NSAIDs - Has contraindications (see above)

The patient has or will have more than mild intermittent pain

**Step 1: Select acetaminophen approach appropriate for patient (must select one)**

Acetaminophen Dose Limit 4 grams

Acetaminophen Dose Limit 2 grams

The patient cannot receive acetaminophen because of contraindications (e.g. monitoring for neutropenic fever, acetaminophen allergy)

**Step 2: Select NSAID, if appropriate (must select one)**

**Patient cannot receive NSAIDs: Has contraindications (transplant patient, active bleeding, recent GI bleeding, CHF, eGFR<60, monitoring for neutropenic fever, on therapeutic anticoagulation where bleeding risk greater than benefit, documented allergy, or pregnancy)**

Preferred : Ibuprofen (MOTRIN) tablet

ibuprofen (ADVIL,MOTRIN) tablet 600 mg  
600 mg, Oral, Every 8 Hours Scheduled, 15 doses, with the First Dose today at 1400, Last dose on Wed 2/16 at 0600

Alternate for patients briefly not able to take PO: Ketorolac/Ibuprofen

The patient cannot receive NSAIDs - Has contraindications (see above)

Step 3: Choose additional opioid sparing medication (optional)

Step 4: Consider adding oral opioids for pain not managed with approaches above (optional)

Step 5: Consider adding parenteral opioid for pain not managed with approaches above (optional)

**eAppendix 4: Defining Clinical Harms****Gastrointestinal Bleed ICD-10 Codes**

'I85.01', 'K20.81', 'K20.91', 'K21.01', 'K22.11', 'K25.0', 'K25.2', 'K25.4', 'K25.6', 'K26.0', 'K26.2', 'K26.4', 'K26.6', 'K27.2', 'K27.4', 'K27.6', 'K28.0', 'K28.2', 'K28.6', 'K29.01', 'K29.21', 'K29.31', 'K29.41', 'K29.51', 'K29.61', 'K29.71', 'K29.81', 'K29.91', 'K31.811', 'K50.00', 'K52.81', 'K55.21', 'K92.2', 'K57.01', 'K57.11', 'K57.13', 'K57.21', 'K57.31', 'K57.33', 'K57.41', 'K57.51', 'K57.53', 'K57.81', 'K57.91', 'K57.93', 'K92.2'

**Acute Kidney Injury ICD-10 Codes**

'N17.0\*', 'N17.8\*', 'N17.9\*', 'N19\*'

**eAppendix 5: Baseline characteristics of randomized clinicians admitting at least 1 qualifying patient**

| Clinician characteristics |                       | Control Group<br>N=536 | Intervention Group<br>N=534 | p-value |
|---------------------------|-----------------------|------------------------|-----------------------------|---------|
| Years at UCSF (mean (SD)) |                       | 3.5 (3.2)              | 3.5 (3.1)                   | 0.95    |
| Surgeon (%)               |                       | 257 (48)               | 251 (47)                    | 0.80    |
| Gender                    | Female                | 301 (57)               | 296 (58)                    | 1       |
|                           | Male                  | 224 (43)               | 219 (43)                    |         |
|                           | Non-binary or missing | 11 (2)                 | 19 (4)                      |         |
| Department at Login (%)   | Medicine              | 153 (36)               | 182 (42)                    | 0.11    |
|                           | Surgery               | 206 (49)               | 179 (42)                    |         |
|                           | Other                 | 65 (15)                | 69 (16)                     |         |
|                           | Missing               | 112 (21)               | 104 (20)                    |         |
| Clinician Type (%)        | Attending             | 169 (32)               | 182 (34)                    | 0.58    |
|                           | APP                   | 83 (16)                | 80 (15)                     |         |
|                           | Resident              | 273 (51)               | 255 (48)                    |         |
|                           | Medical Student       | 10 (2)                 | 14 (3)                      |         |
|                           | Other                 | 1 (0.2)                | 1 (0.2)                     |         |
